# Supplementary material for: Evaluation of the Drug-Induced Liver Injury Potential of Saxagliptin through Reactive Metabolite Identification in Rats
Source: MDPI journal article supplement (doi:10.3390/pharmaceutics16010106), 2024-01-13
Supplement: s1 [file s1]

# Evaluation of the Drug-Induced Liver Injury Potential of Saxagliptin through Reactive Metabolite Identification in Rats

Ki-Young Kim <sup>1,†</sup>, Yeo-Jin Jeong <sup>1,†</sup>, So-Young Park <sup>1,2</sup>, Eun-Ji Park <sup>1</sup>, Ji-Hyeon Jeon <sup>1</sup>,  
Im-Sook Song <sup>1,\*</sup> and Kwang-Hyeon Liu <sup>1,2,\*</sup>

<sup>1</sup> BK21 FOUR KNU Community-Based Intelligent Novel Drug Discovery Education Unit,  
Research Institute of Pharmaceutical Sciences, College of Pharmacy, Kyungpook National University, Daegu  
41566, Republic of Korea; neanic12@naver.com (K.-Y.K.); duwls9902@gmail.com (Y.-J.J.);  
soyoung561@hanmail.net (S.-Y.P.); roseej98@naver.com (E.-J.P.); kei7016@naver.com (J.-H.J.)

<sup>2</sup> Mass Spectrometry Based Convergence Research Institute, Kyungpook National University,  
Daegu 41566, Republic of Korea

\* Correspondence: isssong@knu.ac.kr (I.-S.S.); dstlkh@knu.ac.kr (K.-H.L.); Tel.: +82-53-950-8569 (I.-S.S.);  
+82-53-980-8567 (K.-H.L.); Fax: +82-53-950-8557 (I.-S.S. & K.-H.L.)

<sup>†</sup> These authors contributed equally to this work.

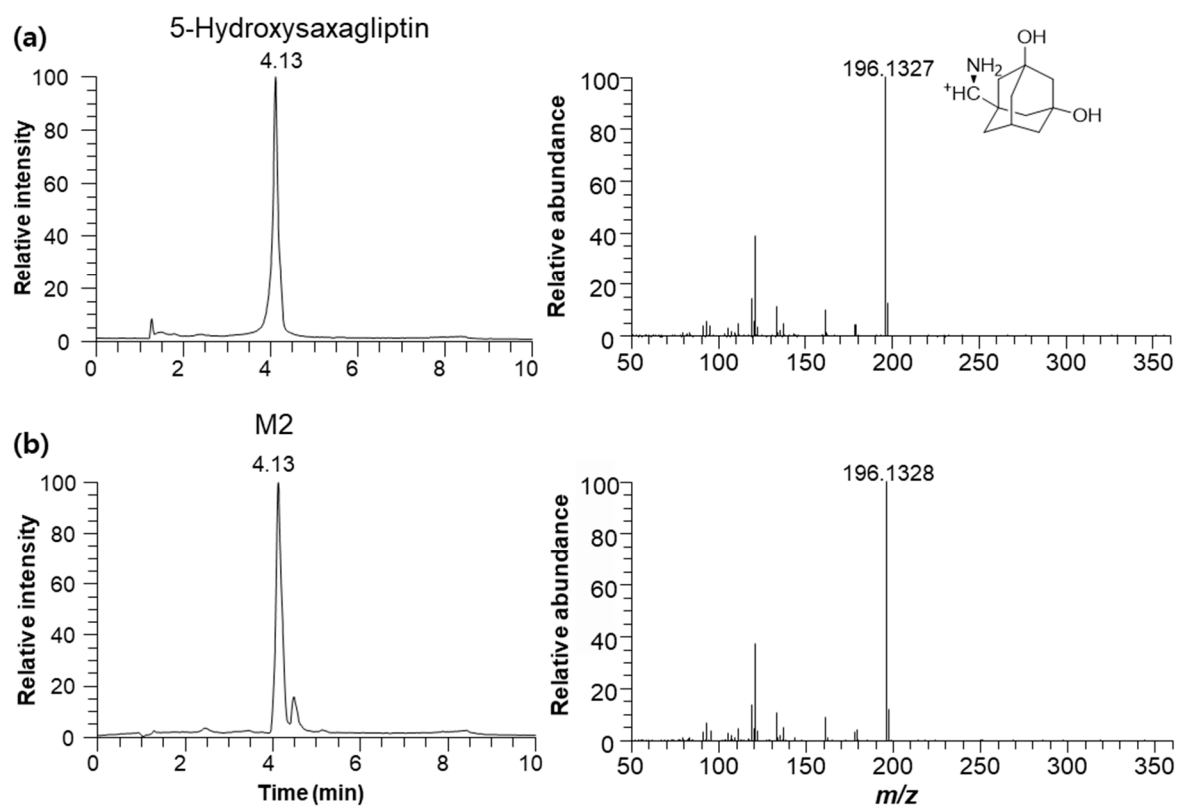

**Figure S1.** Representative extracted ion chromatograms ( $m/z$  332.1969, left panel) and product ion scan mass spectra (right panel) of the authentic 5-hydroxysaxagliptin standard (a) and M2 (b).

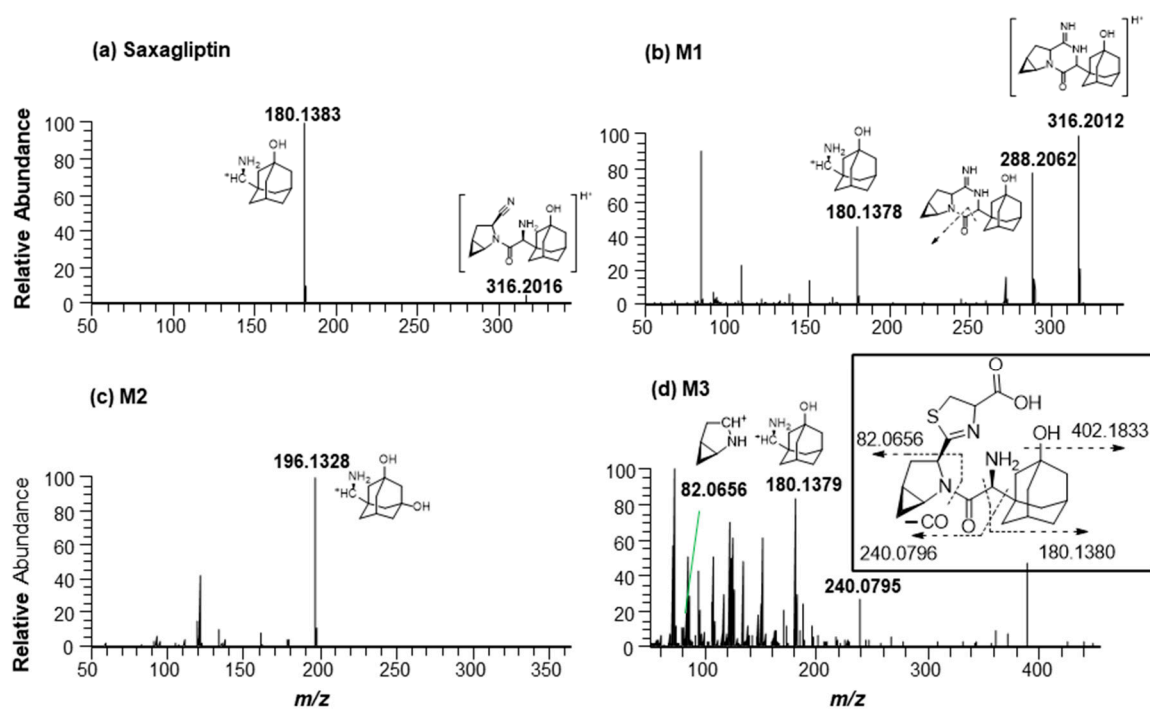

**Figure S2.** Product ion scan mass spectra of saxagliptin (P, a,  $m/z$  316.2020), M1 (b,  $m/z$  316.2020), M2 (c,  $m/z$  332.1969), and M3 (d,  $m/z$  420.1952) which were found in bile, plasma, or liver tissues following the intraperitoneal injection of saxagliptin in rats.

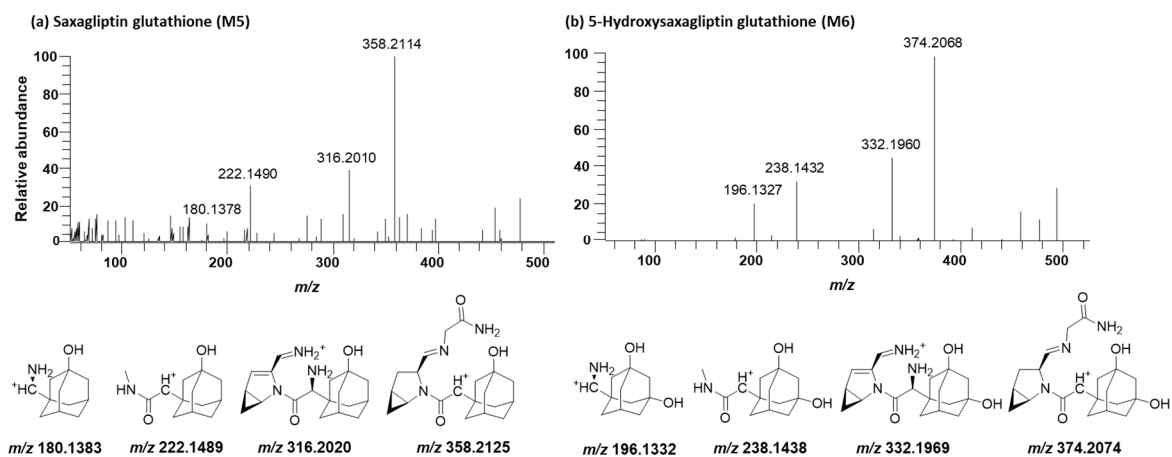

**Figure S3.** Product ion scan mass spectra of saxagliptin–cysteinyglycine conjugate (a,  $m/z$  477.2166, M5) and 5-hydroxysaxagliptin–cysteinyglycine conjugate (b,  $m/z$  493.2115, M6) and proposed chemical fragment ion structure.

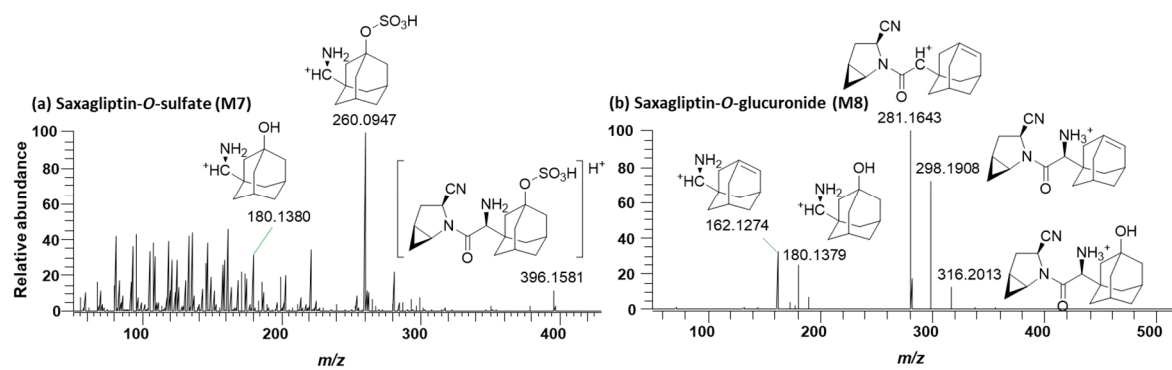

**Figure S4.** Product ion scan mass spectra of saxagliptin-O-sulfate (a,  $m/z$  396.1588, M7) and saxagliptin-O-glucuronide (b,  $m/z$  492.2340, M8) and the proposed chemical structure of the fragment ions.
